# Supplementary material
Source: Springer Nature journal article supplement (https://www.springermedizin.de/resource/supplementary/12967_2011_731_MOESM10_ESM.pdf/9577388)

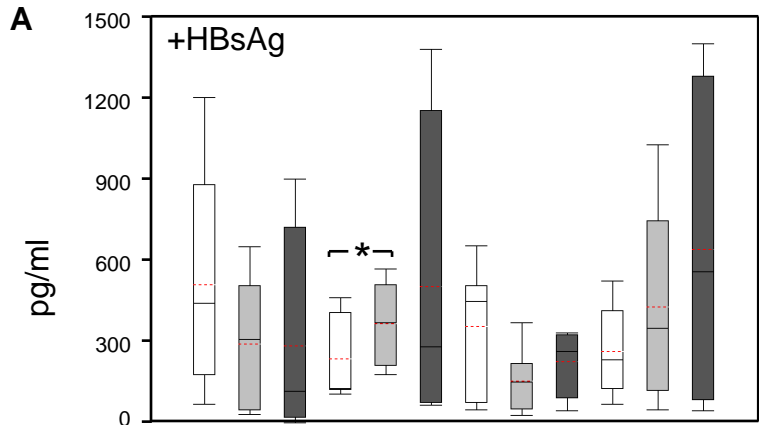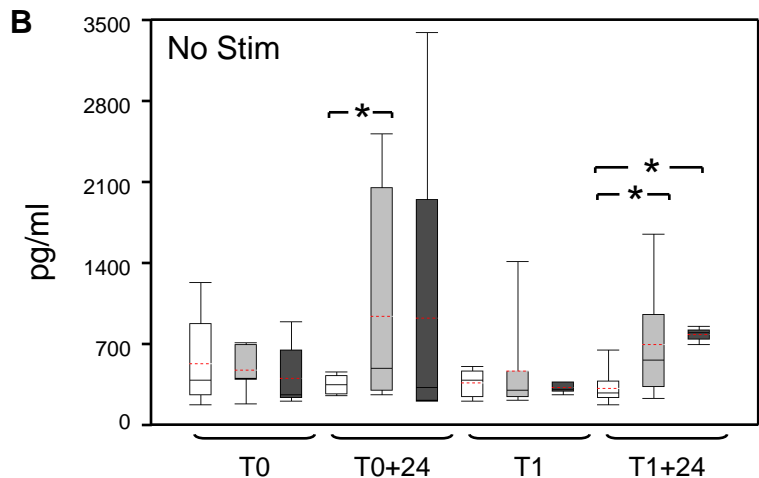

Supplement: MOESM10 [file 9577388]
